# Supplementary material for: A novel CBCT-based method for derivation of CTV-PTV margins for prostate and pelvic lymph nodes treated with stereotactic ablative radiotherapy
Source: Radiat Oncol. 2017 Aug 4;12:124. doi: 10.1186/s13014-017-0859-z (PMC5543558; doi:10.1186/s13014-017-0859-z)
Supplement: Supplementary file 3 — Appendix C: Margin expansion results for individual patients. (XLSX 35 kb) [file 13014_2017_859_MOESM3_ESM.xlsx]

## Sheet: PO
Patient	Match Type	Calculated Percentage Overlap (%) for each CTV-PTV Margin (mm)													95% Margin
		0	1	2	3	4	5	6	7	8	9	10	11		Bone	Prostate
1	Bone	65.8363	86.121	91.1032	93.9502	98.5765	99.6441	99.6441	100	100					3.22692
	Prostate	65.493	86.6197	92.2535	95.7746	98.2394	99.2958	99.6479	100	100						2.78
2	Bone	76.2238	90.2098	94.0559	96.5035	98.2517	99.3007	99.6503	100	100					2.38571
	Prostate	66.6667	78.9644	85.4369	89.644	94.4984	97.7346	99.3528	99.6764	100						4.155
3	Bone	47.1322	58.1047	63.8404	68.3292	76.5586	82.0449	87.2818	92.7681	95.7606					7.74583
	Prostate	54.186	70.2326	78.6047	84.4186	93.2558	96.7442	98.3721	99.3023	99.5349						4.5
4	Bone	53.1915	65.2482	71.6312	75.8865	81.5603	86.1702	90.4255	94.3262	97.1631					7.2375
	Prostate	58.5271	77.907	85.6589	90.6977	96.124	98.062	98.4496	99.2248	99.6124						3.79286
5	Bone	85.25	93	95.5	96.75	98.25	99	99.25	99.5	99.5					1.8
	Prostate	83.1754	96.4455	98.3412	98.8152	99.0521	99.2891	99.5261	99.763	100						0.891071
6	Bone	90.1042	97.6562	98.6979	99.2188	99.4792	99.7396	99.7396	99.7396	99.7396					0.648276
	Prostate	86.5	96.75	98.75	99.25	99.5	99.75	99.75	100	100						0.829268
7	Bone	65.9164	80.3859	87.7814	92.6045	95.4984	97.4277	98.7138	99.0354	99.3569					3.82778
	Prostate	64.7619	79.3651	86.3492	91.4286	96.5079	98.7302	99.6825	100	100						3.70312
8	Bone	54.4658	64.7986	69.1769	72.6795	78.2837	82.1366	85.9895	88.6165	90.8932	92.8196	94.5709	96.1471		10.2722
	Prostate	56.6456	69.462	75	79.1139	86.3924	90.5063	93.8291	97.4684	98.5759						6.32174
9	Bone	75.4045	88.6731	94.4984	97.411	98.3819	98.7055	99.0291	100	100					2.17222
	Prostate	72.2222	87.3457	92.284	95.679	97.5309	98.4568	98.7654	100	100						2.8
10	Bone	58.299	67.9012	72.8395	77.0919	83.4019	87.7915	91.2209	94.1015	96.2963	97.8052				7.40937
	Prostate	65.3226	78.4946	83.3333	86.6935	92.7419	95.4301	97.043	98.6559	99.1935						4.84
11	Bone	65.7534	88.3562	94.5205	97.9452	99.3151	99.3151	99.3151	99.3151	99.3151					2.14
	Prostate	72.4638	92.029	96.3768	98.5507	99.2754	100	100	100	100						1.68333
12	Bone	79.2453	96.8553	99.0566	99.3711	100	100	100	100	100					0.894643
	Prostate	96.4844	99.2187	99.6094	100	100	100	100	100	100						0
13	Bone	58.5714	69.7143	75.1429	78.8571	84.8571	88.8571	92.2857	95.7143	97.7143					6.79167
	Prostate	63.6628	76.4535	81.1047	83.7209	89.8256	92.7326	94.186	97.9651	98.8372						6.21538
14	Bone	59.5041	69.697	73.5537	76.3085	81.8182	85.6749	89.2562	93.3884	95.8678					7.65
	Prostate	72.327	86.7925	90.566	93.0818	96.5409	98.1132	99.0566	99.3711	99.6855						3.55455
15	Bone	53.125	69.7917	73.9583	76.0417	81.25	84.375	86.4583	92.7083	93.75	97.9167				8.3
	Prostate	84.2105	92.9825	96.4912	98.2456	100	100	100	100	100						1.575
16	Bone	58.4098	69.1131	74.9235	79.2049	86.8502	91.7431	95.4128	97.5535	98.7768					5.8875
	Prostate	80.5031	92.1384	94.0252	94.9686	97.7987	98.4277	98.7421	99.3711	100						3.01111
17	Bone	67.0034	80.1347	84.8485	88.5522	92.2559	94.9495	97.6431	98.6532	99.3266					5.01875
	Prostate	80.0633	90.8228	94.6203	96.519	97.7848	98.4177	98.7342	100	100						2.2
18	Bone	67.8571	81.9196	87.7232	92.8571	95.7589	97.5446	98.4375	98.8839	99.1071					3.73846
	Prostate	77.4112	89.0863	92.3858	94.9239	96.7005	97.9695	98.4772	98.731	98.9848						3.04286
19	Bone	81.0924	91.1765	95.7983	97.479	97.8992	100	100	100	100					1.82727
	Prostate	93.9535	96.7442	97.2093	100	100	100	100	100	100						0.375
20	Bone	71.8095	81.9048	85.5238	88.9524	92.1905	94.4762	96.381	97.5238	98.6667					5.275
	Prostate	94.2065	97.2292	97.733	97.9849	100	100	100	100	100						0.2625
													Average		4.71246	2.82664
													Std. Dev.		2.82561	1.86675
												Population Margin			8.33362	5.21898

## Sheet: PSV
Patient	Match Type	Calculated Percentage Overlap (%) for each CTV-PTV Margin (mm)														95% Margin
		0	1	2	3	4	5	6	7	8	9	10	11	12		Bone	Prostate
1	Bone	68.7657	85.8942	91.6877	94.7103	98.4887	99.4962	99.7481	99.7481	99.7481						3.07667
	Prostate	67.0157	84.555	90.5759	94.7644	97.644	99.2147	99.7382	100	100							3.08182
2	Bone	64.2857	77.1008	81.5126	84.2437	88.6555	91.8067	94.1176	96.2185	97.8992						6.42
	Prostate	66.2996	80.1762	86.5639	90.7489	95.3744	98.0176	99.3392	99.5595	99.5595							3.91905
3	Bone	44.3182	54.9242	60.6061	65.1515	73.6742	79.3561	85.4167	91.8561	95.6439						7.83
	Prostate	55.0442	72.3894	81.4159	87.0796	95.2212	97.8761	99.115	99.646	99.823							3.97283
4	Bone	41.5778	55.2239	63.113	69.2964	77.3987	84.0085	90.1919	94.6695	97.6546						7.11071
	Prostate	48.9209	68.1055	76.259	81.5348	88.4892	92.3261	94.7242	96.6427	98.0815							6.14375
5	Bone	83.9858	92.7046	95.7295	97.331	98.7544	99.6441	99.8221	100	100						1.75882
	Prostate	83.2192	94.6918	97.4315	98.6301	99.1438	99.6575	99.8288	99.8288	100							1.1125
6	Bone	90.0356	97.8648	99.2883	99.6441	99.8221	99.8221	100	100	100						0.634091
	Prostate	87.0242	97.0588	98.9619	99.654	99.827	100	100	100	100							0.794828
7	Bone	53.4687	71.066	79.6954	85.6176	92.0474	96.1083	98.1387	98.9848	99.4924						4.72708
	Prostate	56.5295	74.9553	83.1843	88.9088	94.9911	98.0322	99.1055	99.4633	99.8211							4.00294
8	Bone	53.5088	64.1604	69.1729	72.9323	77.8195	81.8296	85.589	88.4712	91.1028	93.3584	95.1128				9.93571
	Prostate	58.655	71.8555	77.9577	82.3163	88.9166	92.6526	95.6413	98.0075	98.7547							5.78542
9	Bone	68.0387	82.8087	90.3148	94.6731	97.8208	98.7893	98.7893	99.7579	99.7579						3.10385
	Prostate	69.5545	85.1485	91.0891	94.3069	97.5248	98.5149	98.7624	99.7525	99.7525							3.21538
10	Bone	50.1969	59.4488	64.1732	67.9134	74.7047	79.1339	82.874	87.3031	89.7638		94.685	95.7677			10.2909
	Prostate	59.9432	72.822	78.5038	82.3864	89.1098	92.7083	95.2652	97.4432	98.5795							5.8963
11	Bone	58.4838	81.2274	88.0866	91.6968	97.8339	99.278	99.639	100	100						3.53824
	Prostate	68.1818	88.4298	94.2149	97.5207	99.5868	100	100	100	100							2.2375
12	Bone	76.4444	95.7778	99.5556	99.7778	100	100	100	100	100						0.95977
	Prostate	97.4432	99.4318	99.7159	99.7159	99.7159	100	100	100	100							0
13	Bone	50.4425	61.0619	65.9292	69.2478	76.1062	80.531	84.0708	89.6018	92.2566	94.9115	97.1239				9.04
	Prostate	61.0577	74.2788	78.3654	80.5288	87.2596	90.625	91.5865	96.875	97.1154							6.64545
14	Bone	45.2703	60.6419	65.5405	68.75	77.5338	82.2635	85.8108	92.0608	94.2568	96.7905					8.29333
	Prostate	55.1102	71.5431	75.3507	77.7555	84.3687	87.3747	88.978	93.1864	94.7896							8.105
15	Bone	40.6863	60.2941	68.1373	73.5294	82.3529	88.2353	91.6667	97.0588	98.5294						6.61818
	Prostate	60.4839	82.2581	90.3226	95.1613	98.3871	99.1935	100	100	100							2.96667
16	Bone	39.51	49.6172	55.2833	60.0306	67.5345	73.2006	78.7136	83.1547	86.5237			93.415	95.0995		11.9409
	Prostate	63.1661	76.3323	81.5047	85.1097	89.9687	93.1034	95.6113	97.0219	98.1191							5.75625
17	Bone	52.0362	64.7059	69.9095	73.9819	81.448	85.9729	90.2715	93.6652	95.9276						7.59
	Prostate	71.2446	84.7639	90.3433	93.3476	96.7811	98.7124	99.5708	99.7854	99.7854							3.48125
18	Bone	63.4586	79.0977	85.8647	91.4286	95.188	97.4436	98.6466	99.5489	99.6992						3.95
	Prostate	68.2183	83.1461	88.764	93.2584	96.3082	98.0738	99.0369	99.679	99.8395							3.57105
19	Bone	76.0417	88.0208	94.0104	97.1354	98.6979	99.2188	99.2188	99.4792	99.4792						2.31667
	Prostate	87.1866	94.429	96.9359	98.0501	98.8858	99.1643	99.1643	99.4429	99.4429							1.22778
20	Bone	65.7074	77.9376	83.2134	87.7698	91.9664	94.8441	96.7626	97.8417	98.801						5.08125
	Prostate	77.9685	85.4077	89.2704	92.7039	95.5651	97.568	98.5694	99.1416	99.4278							3.8025
														Average		5.71081	3.78591
														Std. Dev.		3.28558	2.12535
													Population Margin			9.92145	6.50965

## Sheet: LN
Patient	Match Type	Calculated Percentage Overlap (%) for each CTV-PTV Margin (mm)											95% Margin
		0	1	2	3	4	5	6	7	8	9		Bone	Prostate
1	Bone	73.0437	87.7663	90.2552	93.0184	95.3174	96.119	97.0892	97.5322	98.0384			3.86193
	Prostate	70.8447	84.1163	86.897	89.9937	93.3221	94.7967	96.4609	97.0297	97.6195				5.12215
2	Bone	73.3445	86.469	88.525	90.9634	92.9237	94.1191	95.8642	96.5336	97.4181			5.50479
	Prostate	58.4189	72.7451	76.3267	80.891	87.6392	90.4346	93.1644	96.5713	97.5759				6.53878
3	Bone	83.3298	94.6191	95.21	96.054	96.7504	97.1513	97.6155	97.8265	98.122			1.64464
	Prostate	69.7146	81.25	83.7822	86.6961	90.9164	92.6246	94.1921	96.8047	97.5683				6.30923
4	Bone	73.9484	86.2189	88.9147	91.8661	94.3528	95.5612	97.0021	97.4436	98.0014			4.53558
	Prostate	68.7147	81.5892	84.6722	88.3413	92.9006	94.6809	96.548	97.1993	97.8723				5.17093
5	Bone	80.4556	92.8678	93.4426	95.0607	95.9336	96.6574	97.1471	97.5516	97.8071			2.9625
	Prostate	79.5975	89.3171	91.0298	93.9413	95.9752	96.6174	97.0542	97.431	97.7093				3.52053
6	Bone	79.1343	91.0766	92.7636	94.5838	96.3374	97.0477	97.98	98.313	98.6238			3.23734
	Prostate	75.4164	88.657	90.8918	93.2532	95.4038	96.3314	97.5332	97.976	98.4187				3.81225
7	Bone	84.9802	94.0711	95.1113	96.2139	97.1708	97.7325	98.2525	98.5022	98.7102			1.893
	Prostate	72.9366	88.3989	90.7722	93.0393	97.0067	97.7329	98.3174	98.5654	98.7956				3.4942
8	Bone	80.8239	91.7128	93.351	94.9651	96.4587	97.1814	97.9764	98.2655	98.5787			3.02339
	Prostate	64.669	78.8288	81.649	85.0372	89.8942	92.0877	94.6533	97.0035	97.9828				6.1475
9	Bone	79.2437	92.3731	92.3731	94.2639	95.2411	96.2184	96.5371	97.1744	97.4081			3.75326
	Prostate	77.8583	87.5932	87.5932	90.8244	94.2833	95.4018	95.7332	96.396	96.6446				4.64074
10	Bone	75.9303	88.1778	89.8788	92.0051	93.8975	94.8543	96.3002	96.8531	97.5122			5.10074
	Prostate	59.1623	70.2922	73.3153	77.2505	82.8745	85.5261	88.8026	92.2986	94.0044	96.3182			8.43029
11	Bone	65.8163	82.2629	84.8439	88.4154	91.4766	92.9172	95.5282	96.4586	97.7191			5.7977
	Prostate	59.2521	77.2065	80.5334	84.9326	89.9643	91.6965	94.6384	95.7108	97.0855				6.33718
12	Bone	78.489	92.5498	93.2581	95.1731	96.5897	97.4816	98.2686	98.7146	99.0556			2.90959
	Prostate	82.1232	92.1342	93.2068	95.132	96.6172	97.4697	98.2948	98.6799	99.0099				2.93143
13	Bone	76.6467	89.657	91.9978	94.5563	96.7338	97.5776	98.5846	98.9657	99.3468			3.20375
	Prostate	59.5222	75.1954	78.8569	83.4785	89.0377	91.6499	94.6417	96.8966	98.3032				6.15891
14	Bone	79.4965	90.2687	92.1084	93.8998	95.0375	95.5943	96.1753	96.3931	96.6594			3.96702
	Prostate	63.9013	79.3861	83.505	87.6821	91.0628	93.0639	95.1039	95.8617	96.6388				5.94905
15	Bone	83.5788	93.8352	95.0173	95.7811	96.2539	96.5448	96.8903	97.0722	97.3268			1.98538
	Prostate	67.2485	77.1598	79.4527	82.4112	86.0651	87.574	89.5266	91.9379	93.2249	95.0592			8.96774
16	Bone	85.6901	90.8975	91.8713	92.8874	93.6918	94.3268	95.1312	95.5123	96.6977			5.83684
	Prostate	71.783	82.4643	85.5761	88.73	91.8419	93.1455	95.0378	95.4584	96.5517				5.98
17	Bone	88.5242	94.187	94.8091	95.474	95.9674	96.2891	96.6752	96.8683	97.1471			2.2871
	Prostate	75.3346	87.1063	89.5276	91.9882	95.4724	96.2795	96.8504	97.0472	97.3228				3.86441
18	Bone	80.4912	90.2919	90.2919	92.215	93.5589	94.7868	95.1344	95.7831	96.038			5.61333
	Prostate	81.5186	90.043	90.043	92.3591	93.6008	94.723	95.0812	95.7259	95.9647				5.77333
19	Bone	81.25	91.6508	91.6508	93.1775	93.8931	94.5134	94.7042	95.0859	95.2767			6.775
	Prostate	81.3343	90.7973	90.7973	92.9737	93.7544	94.3932	94.5824	95.0083	95.1975				6.98056
20	Bone	81.5009	90.3377	90.3377	93.0769	94.2402	95.2345	95.4784	95.9099	96.1163			4.76415
	Prostate	78.5635	89.1611	89.1611	92.5761	94.2279	95.2116	95.4157	95.8612	96.0653				4.78491
											Average		3.93285	5.54571
											Std. Dev.		1.49845	1.59143
										Population Margin			5.85319	7.58521
